# Supplementary material for: Adaptation of an Adult Web Application for Type 1 Diabetes Self-management to Youth Using the Behavior Change Wheel to Tailor the Needs of Health Care Transition: Qualitative Interview Study
Source: JMIR Diabetes. 2023 Apr 26;8:e42564. doi: 10.2196/42564 (PMC10173038; doi:10.2196/42564)
Supplement: Multimedia Appendix 3 [file diabetes_v8i1e42564_app3.docx]

Multimedia Appendix III: Topics to be included proposed by participants

| **Topic** | **Sub-topic** | **Example of titles** |
| --- | --- | --- |
| Diabetes-related management | | - Medical technology management | | --- | | - Medication management | | - Relationship with healthcare team | | - Transition to adult care (pre, during, and post) | | - How can I correct hypo/hyperglycemia?  - How can I keep my blood glucose sensor from falling?  - How can I prepare for my transition to adult care?  - How to establish a good relationship with my new healthcare team?  - How to manage and select my pump parameters?  - How to organise my file transfer?  - How to select my insulin pump?  - List of medical exam recall (e.g., when to do the eye exam)  - List of questions to ask to the doctor during my first meeting at adult care  - What are my responsibilities to ensure a fluid transition?  - What are the different types of insulin and their active period?  - What should I do if I want to change doctor?  - What to do if I give myself too much insulin? What to do if I miss an insulin dose?  - What to do if I have ketone bodies and I am not at home?  - What will my adult healthcare team look like? |
| Medical coverage | - Insurance  - Special support program | | - How should I transfer from my parent’s insurance to mine? | | --- | | - Insurance and bursary programs | | - What is covered by the provincial health care system? | |
| Latest news | - Latest research results  - Social events organized by the diabetes organization | - Advancements in the field of diabetes  - New technologies and proposed therapies  - Postings on current research participant recruitments |
| Lifestyle | | - Alcohol | | --- | | - Drugs | | - Mental health | | - Nutrition | | - Physical activity | | - Sexuality | | - Sleep | | - Social event | | - Travel | | | - Carbohydrate counting with and without pumps | | --- | | - Diabetes and mood swings | | - How should I prepare for pregnancy? | | - How to prepare for Halloween? | | - How to travel with diabetes? | | - Recipes and their nutritional content | | - What is the impact of physical activity on glycemia? | | - Which food should I eat before doing physical activity? | |
| Pathophysiology of diabetes | - Difference between different types of diabetes  - Etiology of diabetes (especially of type 1 diabetes)  - Medical complications | | - Are hyperglycemia less serious than hypoglycemia? | | --- | | - How to deal with nocturnal hypoglycemia? | | - What are the factors that can induce type 1 diabetes? | | - What are the potential complications if I don’t manage my diabetes properly? | | - Why can uncontrolled diabetes lead to complications? | |
| Peer experience | - Feedback/review on diabetes-related products  - Management of diabetes  - Personal story | | - How do others live transition in their life (e.g., when changing school, when going to adult care) | | --- | | - How do others travel with diabetes? | | - How to live with diabetes and coeliac disease? | | - Opinion on different types of insulin pumps | |
| Social relationships and interactions | - Explaining diabetes to others  - Perception of others  - Stigmatization related to type 1 diabetes | | - How to explain diabetes to my family and friends? | | --- | | - What should I say when I don’t want to talk about diabetes with others? | | - What should we do when we are stigmatized by others? | |
